# Supplementary material for: Room temperature sequential ionic deposition (SID) of Ag2S nanoparticles on TiO2 hierarchical spheres for enhanced catalytic efficiency
Source: Royal Society of Chemistry journal article supplement (doi:10.1039/c4ta06674j), 2015-01-01
Supplement: c4ta06674j1.pdf [file c4ta06674j1.pdf]

## Electronic Supplementary Information for

# Room Temperature Sequential Ionic Deposition (SID) of Ag<sub>2</sub>S Nanoparticles on TiO<sub>2</sub> Hierarchical Spheres for Enhanced Catalytic Efficiency

Wei Li Ong,<sup>a</sup> Yee-Fun Lim<sup>b</sup> and Ghim Wei Ho<sup>\*a,b</sup>

<sup>a</sup>*Department of Electrical and Computer Engineering, National University of Singapore, Singapore 117576, Singapore.*

<sup>b</sup>*Institute of Materials Research and Engineering, A\*STAR (Agency for Science, Technology and Research), 3 Research Link, 117602, Singapore.*

**\*Corresponding author:** elehgw@nus.edu.sg; Fax: +65 67754710; Tel: +65 65168121

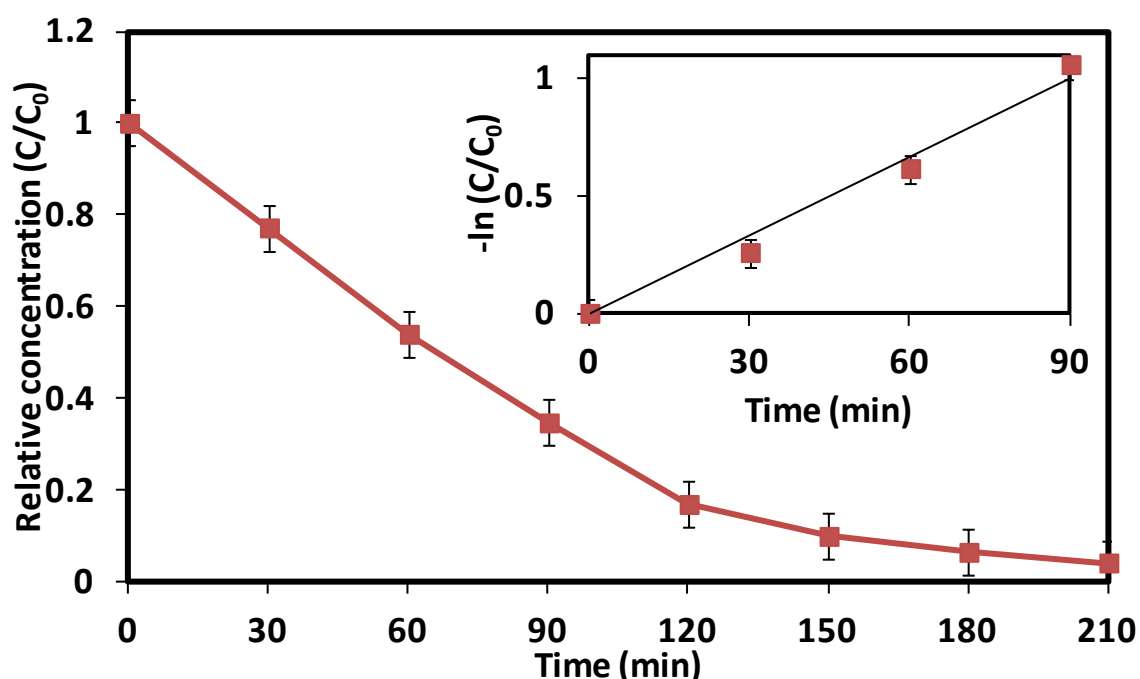

**Fig. S1** Degradation kinetics and (inset) pseudo-first order kinetics of time evolution MO photodegradation study in the presence of 3-Ag<sub>2</sub>S/TiO<sub>2</sub> composite under visible light irradiation. A rate constant ( $k$ ) of 0.011 min<sup>-1</sup> and correlation coefficient ( $R^2$ ) of 0.982 was obtained.
